# Supplementary material
Source: PubMed Central journal article supplement (PMC3404892)
Supplement: NIHMS142998-supplement-Suppdata01.pdf [file NIHMS142998-supplement-Suppdata01.pdf]

**Supp. Figure S1.** (next page) Exonic distribution of newly identified deletions and simple duplications as well as deletions that do not conform to the reading-frame rule. Tick marks are exon numbers and each horizontal bar indicates the range of exons involved in the mutation; black bars represent new mutations; gray bars show deletions associated with at least one occurrence of a phenotype not following the reading-frame rule; hatched bars are previously unreported mutations that do not follow the reading-frame rule. Except for those labeled “a”, “b”, and “c”, bar labels indicate the phenotype(s) and the number(s) of unrelated patients sharing the same exonic range; bars without any label represent mutations associated with a single independent occurrence of Duchenne muscular dystrophy. In mutations with more than one phenotype, the non-rule-conforming clinical diagnosis is marked with an asterisk (\*). Three deletions were associated with more than one phenotype in the same family, marked as follows: (a) both IMD and BMD phenotypes (kindred 7); (b) both DMD and BMD phenotypes (kindred 54); (c) both DMD and IMD phenotypes (kindred 15).

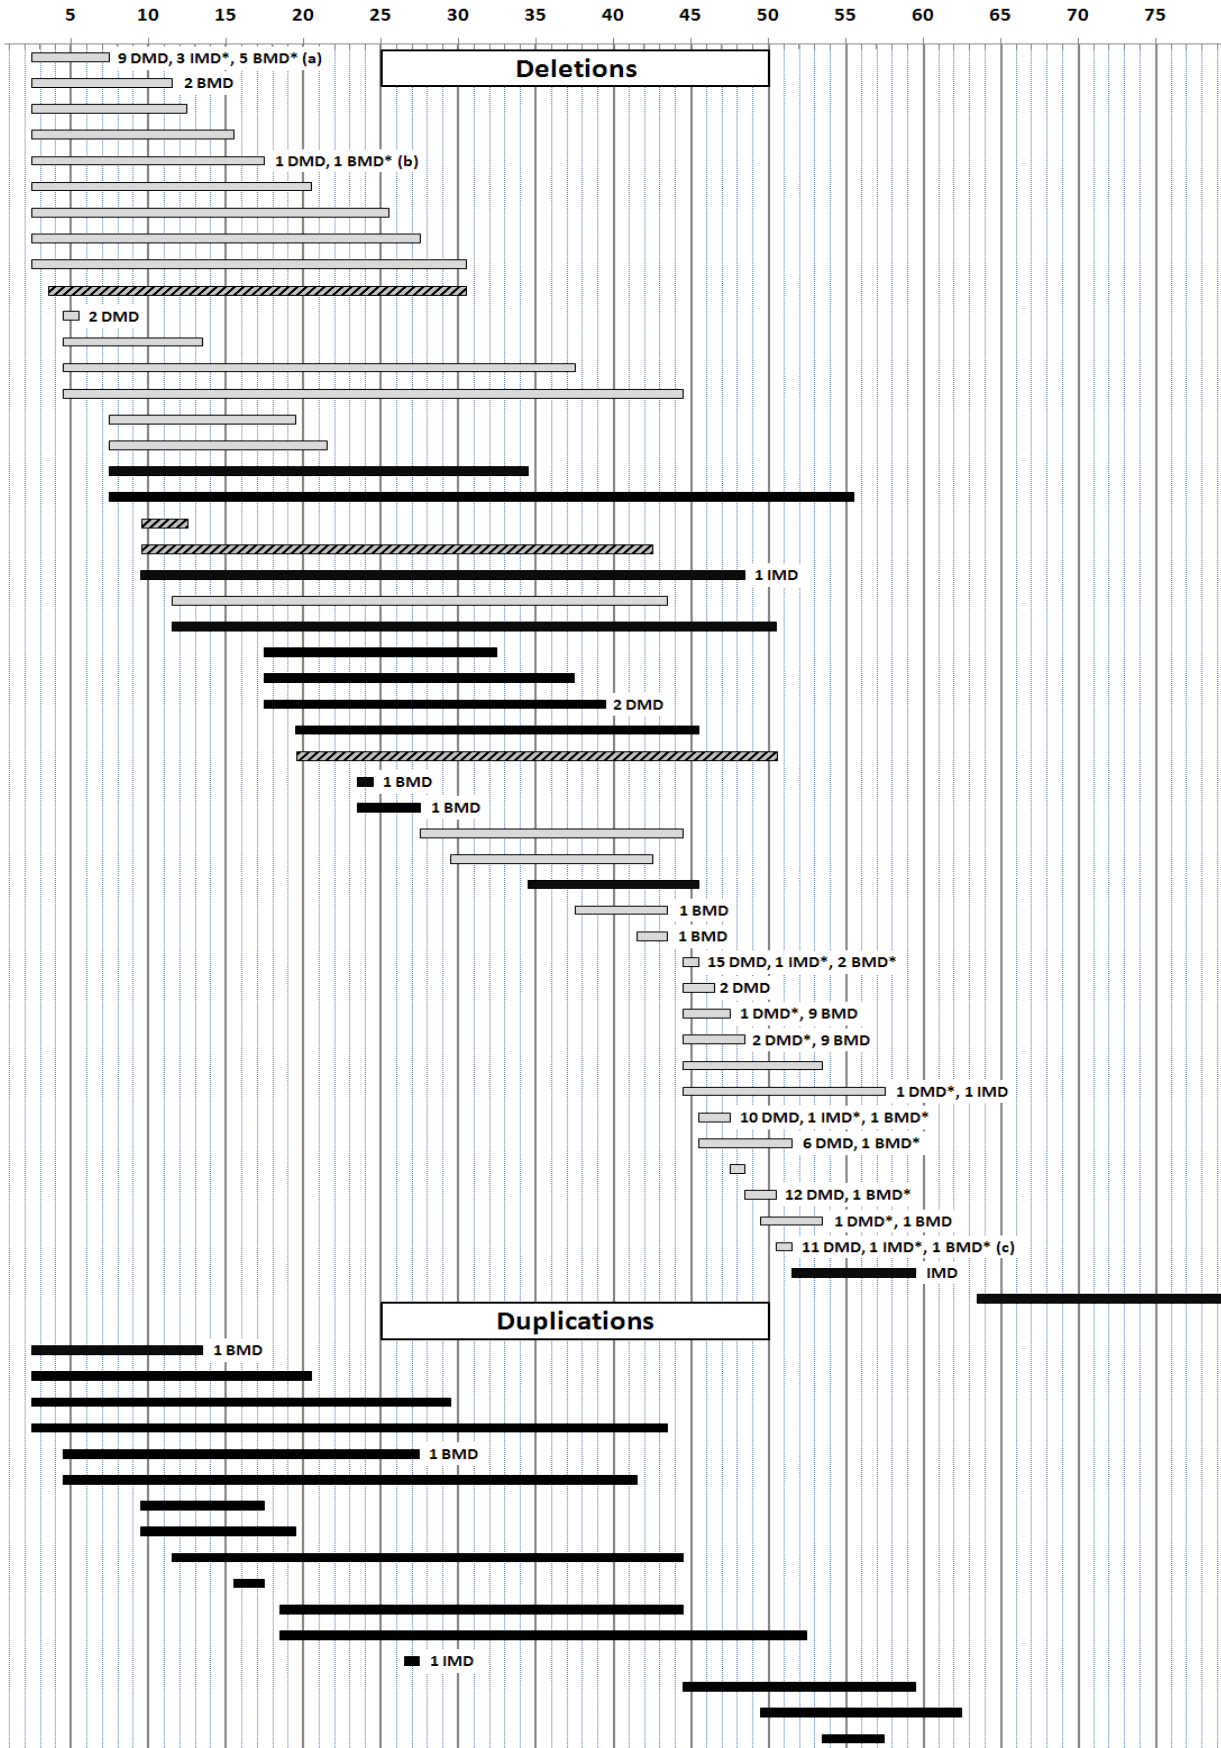

**Supp. Table S1** is included as a separate Excel file.

**Supp. Table S2.** Mutations detected among 858 subjects enrolled in the United Dystrophinopathy Project.

The category of “No Mutation Detected” includes both patients for whom muscle biopsy tissue was not analyzed by RT-PCR (n=37) and patients in whom exhaustive mutation analysis, including sequencing of mRNA, revealed no mutation (n=3). For further discussion see text.

| <b>UDP (Phenotyped) SUMMARY</b>   |            |            |            |                            |                |                |              |               |
|-----------------------------------|------------|------------|------------|----------------------------|----------------|----------------|--------------|---------------|
|                                   | <b>DMD</b> | <b>IMD</b> | <b>BMD</b> | <b>Manifesting Carrier</b> | <b>Carrier</b> | <b>Unknown</b> | <b>Total</b> | <b>%</b>      |
| <b>DELETION</b>                   | 282        | 15         | 55         | 3                          | 13             | 0              | 368          | 48.9%         |
| <i>in</i>                         | 30         | 2          | 36         | 1                          | 2              | 0              | 71           |               |
| <i>out</i>                        | 242        | 13         | 18         | 1                          | 11             | 0              | 285          |               |
| <i>other</i>                      | 10         | 0          | 1          | 1                          | 0              | 0              | 12           |               |
| <b>STOP</b>                       | 113        | 4          | 25         | 2                          | 13             | 0              | 157          | 20.8%         |
| <i>UGA</i>                        | 48         | 1          | 11         | 2                          | 8              | 0              | 70           |               |
| <i>UAG</i>                        | 36         | 0          | 9          | 0                          | 0              | 0              | 45           |               |
| <i>UAA</i>                        | 29         | 3          | 5          | 0                          | 5              | 0              | 42           |               |
| <b>SUBEXONIC</b>                  | 48         | 0          | 10         | 1                          | 5              | 0              | 64           | 8.5%          |
| <i>FS Ins</i>                     | 15         | 0          | 1          | 1                          | 2              | 0              | 19           |               |
| <i>FS Del</i>                     | 32         | 0          | 4          | 0                          | 3              | 0              | 39           |               |
| <i>FS Ins/Del</i>                 | 1          | 0          | 2          | 0                          | 0              | 0              | 3            |               |
| <i>in-frame deletion</i>          | 0          | 0          | 3          | 0                          | 0              | 0              | 3            |               |
| <b>DUPLICATION</b>                | 87         | 7          | 10         | 5                          | 5              | 0              | 114          | 15.1%         |
| <b>SPLICE</b>                     | 19         | 3          | 7          | 2                          | 4              | 0              | 35           | 4.6%          |
| <b>MISSENSE</b>                   | 2          | 1          | 6          | 0                          | 0              | 0              | 9            | 1.2%          |
| <b>PSEUDOEXON</b>                 | 0          | 2          | 2          | 0                          | 0              | 0              | 4            | 0.5%          |
| <b>POTENTIAL</b>                  | 2          | 0          | 0          | 0                          | 0              | 0              | 2            | 0.3%          |
| <b>OTHER</b>                      | 0          | 0          | 0          | 0                          | 0              | 0              | 0            | 0.0%          |
| <b>TOTAL MUTATIONS</b>            | <b>553</b> | <b>32</b>  | <b>115</b> | <b>13</b>                  | <b>40</b>      | <b>0</b>       | <b>753</b>   | <b>100.0%</b> |
| No mutation detected *            | 25         | 0          | 15         | 0                          | 0              | 0              | 40           |               |
| Not dystrophinopathy              |            |            |            |                            |                |                | 14           |               |
| <b>TOTAL SYMPTOMATIC SUBJECTS</b> |            |            |            |                            |                |                | <b>807</b>   |               |
| Negative Carrier Testing          |            |            |            |                            |                |                | 51           |               |
| <b>TOTAL SUBJECTS</b>             |            |            |            |                            |                |                | <b>858</b>   |               |

**Supp. Table S3.** Distribution of nonsense mutations by target size and target mutability.

**Expected Mutations** = the target mutability x (number of total nonsense mutations / number of total target codons). The total number of nonsense mutations observed was 243, and the target size of NM\_004006 is 1500 codons. **Target codons** = number of codons per exon that can be mutated to a nonsense codon via a single base substitution. **Target mutability** = the exon mutability calculated from the summation of the observed relative target codon mutabilities (see Table 4 for mutability values)

| Exon | Observed Mutations | Expected Mutations | Target Codons | Target Mutability | Mutations                                                                    | CGA codons |
|------|--------------------|--------------------|---------------|-------------------|------------------------------------------------------------------------------|------------|
| 1    | 5                  | 1.0                | 5             | 6                 | p.3-TGG(5)                                                                   |            |
| 2    | 0                  | 1.2                | 11            | 7                 |                                                                              |            |
| 3    | 0                  | 1.1                | 7             | 7                 |                                                                              |            |
| 4    | 0                  | 0.6                | 8             | 4                 |                                                                              |            |
| 5    | 1                  | 1.3                | 8             | 8                 | p.119-CAG(1)                                                                 |            |
| 6    | 7                  | 4.5                | 16            | 27                | p.145-CGA(4)<br>p.147-TCA(1)<br>p.143-TGG(1)<br>p.153-CAG(1)                 | 1          |
| 7    | 7                  | 4.3                | 14            | 26                | p.190-CAG(2)<br>p.195-CGA(2)<br>p.189-CAG(1)<br>p.194-CAA(1)<br>p.183-TGG(1) | 1          |
| 8    | 4                  | 3.4                | 25            | 21                | p.229-TTA(1)<br>p.267-CAG(1)<br>p.237-CAA(1)<br>p.249-CAG(1)                 |            |
| 9    | 1                  | 3.9                | 14            | 24                | p.301-TAC(1)                                                                 | 1          |
| 10   | 4                  | 3.2                | 26            | 19                | p.373-GAA(1)<br>p.365-CAA(1)<br>p.338-GAA(1)<br>p.354-TGG(1)                 |            |
| 11   | 4                  | 3.4                | 26            | 21                | p.423-CAG(2)<br>p.429-TCA(1)<br>p.419-GAA(1)                                 |            |
| 12   | 3                  | 2.9                | 25            | 17                | p.489-CAA(1)<br>p.477-GAG(1)                                                 |            |

| Exon | Observed Mutations | Expected Mutations | Target Codons | Target Mutability | Mutations                                                                                                                                                    | CGA codons |
|------|--------------------|--------------------|---------------|-------------------|--------------------------------------------------------------------------------------------------------------------------------------------------------------|------------|
|      |                    |                    |               |                   | p.463-TGG(1)                                                                                                                                                 |            |
| 13   | 0                  | 1.4                | 13            | 9                 |                                                                                                                                                              |            |
| 14   | 8                  | 4.8                | 16            | 29                | p.539-CGA(3)<br>p.555-CAA(3)<br>p.568-CAG(1)<br>p.540-TGG(1)                                                                                                 | 1          |
| 15   | 3                  | 1.9                | 13            | 11                | p.598-TCA(1)<br>p.576-TCA(1)<br>p.595-GAA(1)                                                                                                                 |            |
| 16   | 3                  | 3.7                | 27            | 22                | p.656-CAA(1)<br>p.664-CAG(1)<br>p.654-TTA(1)                                                                                                                 |            |
| 17   | 2                  | 3.0                | 18            | 18                | p.702-GAA(1)<br>p.693-CAG(1)                                                                                                                                 |            |
| 18   | 0                  | 1.9                | 15            | 11                |                                                                                                                                                              |            |
| 19   | 2                  | 3.8                | 14            | 23                | p.767-GAG(1)<br>p.773-AAG(1)                                                                                                                                 | 1          |
| 20   | 12                 | 5.5                | 35            | 33                | p.827-GAG(2)<br>p.807-CAA(2)<br>p.802-AAA(1)<br>p.841-CAA(1)<br>p.806-GAA(1)<br>p.871-AAA(1)<br>p.829-CAG(1)<br>p.814-GAA(1)<br>p.861-TCA(1)<br>p.812-TGG(1) |            |
| 21   | 2                  | 5.0                | 23            | 30                | p.920-CAA(1)<br>p.930-AAA(1)                                                                                                                                 | 1          |
| 22   | 1                  | 3.0                | 19            | 18                | p.954-TGG(1)                                                                                                                                                 |            |
| 23   | 6                  | 6.8                | 36            | 41                | p.1041-CAA(1)<br>p.1046-CAA(1)<br>p.1018-TAT(1)<br>p.1029-TGG(1)<br>p.997-TAC(1)                                                                             | 1          |

| Exon | Observed Mutations | Expected Mutations | Target Codons | Target Mutability | Mutations                                                                         | CGA codons |
|------|--------------------|--------------------|---------------|-------------------|-----------------------------------------------------------------------------------|------------|
|      |                    |                    |               |                   | p.990-CAA(1)                                                                      |            |
| 24   | 4                  | 2.4                | 17            | 15                | p.1075-TGG(1)<br>p.1073-GAG(1)<br>p.1090-CAG(1)<br>p.1074-GAA(1)                  |            |
| 25   | 6                  | 2.9                | 19            | 18                | p.1144-CAG(2)<br>p.1113-CAG(1)<br>p.1102-CAG(1)<br>p.1114-AAG(1)<br>p.1094-TTA(1) |            |
| 26   | 4                  | 3.2                | 33            | 20                | p.1167-TCA(2)<br>p.1182-GAG(1)<br>p.1194-CAG(1)                                   |            |
| 27   | 3                  | 3.1                | 26            | 19                | p.1208-CAA(1)<br>p.1248-CAG(1)<br>p.1234-GAG(1)                                   |            |
| 28   | 3                  | 2.8                | 22            | 17                | p.1274-TAC(1)<br>p.1268-TGG(1)<br>p.1290-AAA(1)                                   |            |
| 29   | 2                  | 4.6                | 18            | 28                | p.1338-GAG(1)<br>p.1328-CAG(1)                                                    | 1          |
| 30   | 4                  | 3.4                | 23            | 20                | p.1370-CAG(2)<br>p.1384-GAG(1)<br>p.1405-CAA(1)                                   |            |
| 31   | 3                  | 2.0                | 16            | 12                | p.1429-AAA(1)<br>p.1414-CAA(1)<br>p.1417-TTG(1)                                   |            |
| 32   | 4                  | 5.5                | 27            | 33                | p.1495-CAG(1)<br>p.1472-CAA(1)<br>p.1469-CAG(1)<br>p.1451-TTA(1)                  | 1          |
| 33   | 1                  | 2.1                | 26            | 13                | p.1540-GAA(1)                                                                     |            |
| 34   | 9                  | 4.8                | 30            | 29                | p.1577-CGA(4)<br>p.1565-CAG(3)<br>p.1598-TCA(1)<br>p.1566-TTG(1)                  | 1          |

| <b>Exon</b> | <b>Observed Mutations</b> | <b>Expected Mutations</b> | <b>Target Codons</b> | <b>Target Mutability</b> | <b>Mutations</b>                                                                                                    | <b>CGA codons</b> |
|-------------|---------------------------|---------------------------|----------------------|--------------------------|---------------------------------------------------------------------------------------------------------------------|-------------------|
| 35          | 4                         | 4.9                       | 28                   | 29                       | p.1666-CGA(2)<br>p.1624-CAG(1)<br>p.1622-GAG(1)                                                                     | 1                 |
| 36          | 2                         | 3.1                       | 21                   | 18                       | p.1712-CAA(1)<br>p.1714-GAA(1)                                                                                      |                   |
| 37          | 2                         | 3.9                       | 18                   | 23                       | p.1752-TTA(1)<br>p.1763-CGA(1)                                                                                      | 1                 |
| 38          | 6                         | 2.3                       | 19                   | 14                       | p.1791-CAA(3)<br>p.1800-GAA(1)<br>p.1802-CAG(1)<br>p.1782-GAA(1)                                                    |                   |
| 39          | 2                         | 4.9                       | 27                   | 29                       | p.1855-CAG(1)<br>p.1844-CGA(1)                                                                                      | 1                 |
| 40          | 5                         | 2.7                       | 25                   | 16                       | p.1885-CAG(1)<br>p.1882-TAC(1)<br>p.1879-TGG(1)<br>p.1870-AAA(1)<br>p.1909-GAA(1)                                   |                   |
| 41          | 10                        | 5.3                       | 25                   | 32                       | p.1967-CGA(4)<br>p.1918-GAA(1)<br>p.1968-AGA(1)<br>p.1956-TGG(1)<br>p.1973-CAA(1)<br>p.1920-CAG(1)<br>p.1934-GAG(1) | 1                 |
| 42          | 3                         | 2.1                       | 22                   | 13                       | p.2035-GAG(2)<br>p.2013-GAA(1)                                                                                      |                   |
| 43          | 5                         | 5.3                       | 22                   | 32                       | p.2095-CGA(3)<br>p.2085-TGG(2)                                                                                      | 1                 |
| 44          | 4                         | 5.5                       | 24                   | 33                       | p.2131-CAA(1)<br>p.2118-CAG(1)<br>p.2098-CGA(1)<br>p.2106-TGG(1)                                                    | 1                 |
| 45          | 4                         | 3.9                       | 26                   | 23                       | p.2198-CAG(1)<br>p.2182-CAG(1)<br>p.2154-CAG(1)<br>p.2149-CAG(1)                                                    |                   |

| Exon | Observed Mutations | Expected Mutations | Target Codons | Target Mutability | Mutations                                                                         | CGA codons |
|------|--------------------|--------------------|---------------|-------------------|-----------------------------------------------------------------------------------|------------|
| 46   | 3                  | 3.2                | 28            | 19                | p.2214-TCA(1)<br>p.2241-GGA(1)<br>p.2217-CAA(1)                                   |            |
| 47   | 4                  | 2.8                | 23            | 17                | p.2286-GAA(2)<br>p.2290-AAA(1)<br>p.2302-TGG(1)                                   |            |
| 48   | 2                  | 3.5                | 29            | 21                | p.2359-CAA(1)<br>p.2336-CAG(1)                                                    |            |
| 49   | 1                  | 2.3                | 18            | 14                | p.2369-GAA(1)                                                                     |            |
| 50   | 0                  | 1.5                | 13            | 9                 |                                                                                   |            |
| 51   | 1                  | 3.1                | 21            | 19                | p.2468-GAG(1)                                                                     |            |
| 52   | 2                  | 4.0                | 16            | 24                | p.2553-CGA(1)<br>p.2526-CAG(1)                                                    | 1          |
| 53   | 5                  | 5.8                | 40            | 35                | p.2574-CAG(1)<br>p.2608-GAG(1)<br>p.2565-CAA(1)<br>p.2561-TGG(1)<br>p.2605-TCA(1) |            |
| 54   | 0                  | 2.1                | 15            | 13                |                                                                                   |            |
| 55   | 3                  | 5.4                | 27            | 33                | p.2721-AAG(1)<br>p.2680-CGA(1)<br>p.2716-CAG(1)                                   | 1          |
| 56   | 4                  | 1.8                | 18            | 11                | p.2791-AAA(2)<br>p.2786-TGG(1)<br>p.2785-AAG(1)                                   |            |
| 57   | 4                  | 3.0                | 17            | 18                | p.2831-CAG(1)<br>p.2822-CAG(1)<br>p.2820-TGG(1)<br>p.2843-AAG(1)                  |            |
| 58   | 4                  | 4.0                | 19            | 24                | p.2870-CGA(4)                                                                     | 1          |
| 59   | 7                  | 7.2                | 38            | 44                | p.2905-CGA(4)<br>p.2925-TGG(1)<br>p.2894-GAG(1)<br>p.2958-GGA(1)                  | 1          |



| <b>Exon</b> | <b>Observed Mutations</b> | <b>Expected Mutations</b> | <b>Target Codons</b> | <b>Target Mutability</b> | <b>Mutations</b>                                                 | <b>CGA codons</b> |
|-------------|---------------------------|---------------------------|----------------------|--------------------------|------------------------------------------------------------------|-------------------|
| 60          | 2                         | 4.1                       | 15                   | 25                       | p.3028-CAG(1)<br>p.2982-CGA(1)                                   | 1                 |
| 61          | 3                         | 2.9                       | 5                    | 18                       | p.3034-CGA(3)                                                    | 1                 |
| 62          | 1                         | 1.1                       | 7                    | 7                        | p.3061-TGG(1)                                                    |                   |
| 63          | 0                         | 1.5                       | 8                    | 9                        |                                                                  |                   |
| 64          | 4                         | 2.9                       | 8                    | 17                       | p.3113-CGA(3)<br>p.3116-CAG(1)                                   | 1                 |
| 65          | 4                         | 2.4                       | 17                   | 15                       | p.3127-TCA(3)<br>p.3143-CAG(1)                                   |                   |
| 66          | 3                         | 2.7                       | 9                    | 17                       | p.3190-CGA(3)                                                    | 1                 |
| 67          | 0                         | 2.1                       | 13                   | 12                       |                                                                  |                   |
| 68          | 2                         | 2.0                       | 16                   | 12                       | p.3318-GAG(1)<br>p.3310-CAG(1)                                   |                   |
| 69          | 4                         | 3.0                       | 10                   | 18                       | p.3345-CGA(1)<br>p.3334-TAT(1)<br>p.3338-CAA(1)<br>p.3326-TAC(1) | 1                 |
| 70          | 16                        | 8.0                       | 17                   | 48                       | p.3381-CGA(7)<br>p.3370-CGA(5)<br>p.3391-CGA(4)                  | 3                 |
| 71          | 0                         | 0.4                       | 1                    | 2                        |                                                                  |                   |
| 72          | 0                         | 0.9                       | 5                    | 6                        |                                                                  |                   |
| 73          | 0                         | 0.3                       | 5                    | 2                        |                                                                  |                   |
| 74          | 1                         | 2.8                       | 22                   | 17                       | p.3493-CAG(1)                                                    |                   |
| 75          | 0                         | 4.1                       | 27                   | 25                       |                                                                  |                   |
| 76          | 3                         | 3.4                       | 7                    | 21                       | p.3635-CAA(1)<br>p.3630-CGA(1)<br>p.3601-CAG(1)                  | 1                 |
| 77          | 0                         | 1.4                       | 10                   | 8                        |                                                                  |                   |
| 78          | 0                         | 0.3                       | 6                    | 2                        |                                                                  |                   |

**Supp. Table S4.** Single Nucleotide Polymorphisms in the DMD gene observed by SCAIP analysis.

All variants listed here are considered polymorphisms, not disease-causing mutations. Exonic (coding-region) polymorphisms are in bold.

| dbSNP rs/ss# |             | Exon           | cDNA/Peptide                  | minor allele (-) | major allele (-) | minor allele count | total allele count | Ancestral Allele (chimp) |
|--------------|-------------|----------------|-------------------------------|------------------|------------------|--------------------|--------------------|--------------------------|
| rs72470543   | ss102660540 | 1 <sup>1</sup> | c.-545_-547delAG <sup>1</sup> | -                | AG               | 1                  | 606                | AG                       |
| rs66718538   | ss102660539 | 1 <sup>1</sup> | c.-457A>C <sup>1</sup>        | C                | A                | 67                 | 637                | C                        |
| rs5927163    | ss102660538 | 1 <sup>1</sup> | c.-210A>G <sup>1</sup>        | G                | A                | 36                 | 692                | A                        |
| rs72470542   | ss102660537 | 1              | c.-114dupT                    | T                | -                | 4                  | 680                | -                        |
| rs72470541   | ss102660536 | 1 <sup>2</sup> | c.-427G>T <sup>2</sup>        | T                | G                | 2                  | 577                | T                        |
| rs72470540   | ss102660535 | 1 <sup>2</sup> | c.-348G>A <sup>2</sup>        | A                | G                | 1                  | 683                | G                        |
| rs72470539   | ss102660534 | 1 <sup>2</sup> | c.-219C>T <sup>2</sup>        | T                | C                | 1                  | 685                | C                        |
| rs72470538   | ss102660533 | 1 <sup>2</sup> | c.-87T>C <sup>2</sup>         | C                | T                | 1                  | 686                | T                        |
| rs72470537   | ss102660532 | 2              | c.32-99A>T                    | T                | A                | 1                  | 654                | T                        |
| rs72470536   | ss102660531 | 2              | c.32-78G>T                    | T                | G                | 3                  | 683                | G                        |
| rs72470535   | ss102660530 | 2              | c.93+98T>C                    | C                | T                | 1                  | 685                | T                        |
| rs72470534   | ss102660529 | 2              | c.93+183A>G                   | G                | A                | 2                  | 687                | A                        |
| rs16990838   | ss102660528 | 2              | c.93+240A>G                   | G                | A                | 10                 | 670                | A                        |
| rs2025666    | ss102660527 | 2              | c.93+303T>A                   | A                | T                | 39                 | 574                | T                        |
| rs72470533   | ss102660526 | 3              | c.94-160dupT                  | T                | -                | 12                 | 641                | -                        |
| rs3764763    | ss102660525 | 3              | c.94-133G>A                   | A                | G                | 176                | 668                | A                        |
| rs72470532   | ss102660524 | 3              | c.94-112A>T                   | T                | A                | 1                  | 683                | A                        |
| rs66800250   | ss102660523 | 3              | c.94-9dupT                    | T                | -                | 69                 | 690                | -                        |
| rs72470531   | ss102660522 | 3              | c.186+35A>T                   | T                | A                | 11                 | 692                | A                        |
| rs989355     | ss102660521 | 3              | c.186+243T>C                  | C                | T                | 65                 | 549                | T                        |

<sup>1</sup> NM\_000109.2, Dp427c Isoform

<sup>2</sup> NM\_004009.2, Dp427p1 Isoform

| dbSNP rs/ss# |             | Exon | cDNA/Peptide                | minor allele (-) | major allele (-) | minor allele count | total allele count | Ancestral Allele (chimp) |
|--------------|-------------|------|-----------------------------|------------------|------------------|--------------------|--------------------|--------------------------|
| rs72470530   | ss102660520 | 4    | c.187-14T>G                 | G                | T                | 1                  | 697                | T                        |
| rs72470529   | ss102660518 | 5    | c.357+42T>C                 | C                | T                | 3                  | 686                | T                        |
| rs72470528   | ss102660517 | 5    | c.357+298dupA               | A                | -                | 2                  | 528                | ? <sup>3</sup>           |
| rs72470527   | ss102660516 | 5    | c.357+351_357+352insC       | C                | -                | 224                | 488                | -                        |
| rs72470526   | ss102660515 | 6    | c.358-428C>T                | T                | C                | 35                 | 675                | C                        |
| rs6631649    | ss102660514 | 6    | c.358-139G>A                | A                | G                | 9                  | 665                | G                        |
| rs17338849   | ss102660513 | 6    | c.358-80T>G                 | G                | T                | 3                  | 690                | T                        |
| rs72470525   | ss102660512 | 6    | c.358-73C>T                 | T                | C                | 1                  | 688                | T                        |
| rs72470524   | ss102660511 | 6    | c.358-51G>C                 | C                | G                | 1                  | 689                | G                        |
| rs72470523   | ss102660510 | 6    | c.530+7A>T                  | T                | A                | 1                  | 688                | A                        |
| rs72470522   | ss102660509 | 6    | c.530+86A>G                 | G                | A                | 1                  | 677                | A                        |
| rs72470521   | ss102660508 | 7    | c.649+76A>G                 | G                | A                | 1                  | 684                | A                        |
| rs1015509    | ss102660507 | 7    | c.649+145C>T                | T                | C                | 321                | 659                | T                        |
| rs72470520   | ss102660506 | 7    | c.649+206T>C                | C                | T                | 9                  | 600                | T                        |
| rs72470519   | ss102660505 | 8    | c.650-374T>G                | G                | T                | 17                 | 677                | T                        |
| rs1800264    | ss102660504 | 8    | <b>c.802T&gt;C p.Leu268</b> | C                | T                | 3                  | 692                | T                        |
| rs72470518   | ss102660503 | 8    | c.831+95A>T                 | T                | A                | 2                  | 692                | A                        |
| rs72470517   | ss102660502 | 8    | c.831+148_831+149dup        | GA               | -                | 21                 | 629                | GA                       |
| rs41303183   | ss102660501 | 9    | c.832-54A>G                 | G                | A                | 26                 | 692                | A                        |
| rs72470516   | ss102660500 | 9    | c.832-44T>A                 | A                | T                | 1                  | 692                | T                        |
| rs72470515   | ss102660499 | 9    | c.832-18C>G                 | G                | C                | 16                 | 692                | C                        |
| rs72470514   | ss102660498 | 9    | c.832-17C>A                 | A                | C                | 17                 | 692                | C                        |
| rs72470513   | ss102660497 | 9    | c.832-15A>G                 | G                | A                | 1                  | 692                | A                        |
| rs1800265    | ss102660496 | 9    | <b>c.837G&gt;A p.Thr279</b> | A                | G                | 21                 | 692                | A                        |

<sup>3</sup> No Human Chimp Alignment

| dbSNP rs/ss# |             | Exon | cDNA/Peptide                    | minor allele (-) | major allele (-) | minor allele count | total allele count | Ancestral Allele (chimp) |
|--------------|-------------|------|---------------------------------|------------------|------------------|--------------------|--------------------|--------------------------|
| rs72470512   | ss102660495 | 9    | c.960+50del                     | -                | G                | 7                  | 683                | G                        |
| rs6631629    | ss102660494 | 9    | c.960+312T>G                    | G                | T                | 21                 | 676                | G                        |
| rs6631628    | ss102660493 | 9    | c.960+330G>A                    | A                | G                | 35                 | 676                | A                        |
| rs6631627    | ss102660492 | 9    | c.960+388G>A                    | A                | G                | 21                 | 672                | A                        |
| rs6631626    | ss102660491 | 9    | c.960+412C>T                    | T                | C                | 25                 | 670                | T                        |
| rs72470511   | ss102660490 | 10   | c.961-148C>T                    | T                | C                | 13                 | 640                | C                        |
| rs72470510   | ss102660489 | 10   | c.961-124G>C                    | C                | G                | 1                  | 692                | G                        |
| rs16990527   | ss102660488 | 10   | c.961-109A>G                    | G                | A                | 16                 | 693                | A                        |
| rs72470509   | ss102660487 | 10   | c.961-39A>G                     | G                | A                | 1                  | 692                | A                        |
| rs72470508   | ss102660486 | 10   | c.961-36T>G                     | G                | T                | 1                  | 694                | T                        |
| rs1800266    | ss102660485 | 10   | <b>c.1095A&gt;C p.Gln365His</b> | C                | A                | 1                  | 695                | A                        |
| rs72470507   | ss102660484 | 10   | <b>c.1098A&gt;T p.Gly366</b>    | T                | A                | 1                  | 696                | A                        |
| rs72470506   | ss102660483 | 10   | c.1149+118G>A                   | A                | G                | 1                  | 674                | G                        |
| rs72470505   | ss102660482 | 11   | c.1150-254dupG                  | G                | -                | 25                 | 614                | -                        |
| rs34155804   | ss102660481 | 11   | <b>c.1225A&gt;T p.Thr409Ser</b> | T                | A                | 1                  | 695                | A                        |
| rs41303189   | ss102660480 | 11   | c.1331+26A>G                    | G                | A                | 6                  | 695                | A                        |
| rs6628728    | ss102660479 | 11   | c.1331+55A>G                    | G                | A                | 22                 | 694                | A                        |
| rs5928065    | ss102660478 | 11   | c.1331+127G>A                   | A                | G                | 217                | 691                | G                        |
| rs72470504   | ss102660477 | 11   | c.1331+131G>C                   | C                | G                | 5                  | 691                | C                        |
| rs72470503   | ss102660476 | 11   | c.1331+145del                   | -                | T                | 49                 | 654                | T                        |
| rs72468702   | ss102660475 | 12   | c.1332-293C>A                   | A                | C                | 14                 | 593                | C                        |
| rs808513     | ss102660474 | 12   | c.1332-286T>C                   | C                | T                | 263                | 599                | T                        |
| rs72468701   | ss102660473 | 12   | c.1332-189A>G                   | G                | A                | 2                  | 669                | A                        |
| rs72468700   | ss102660472 | 12   | c.1332-9A>G                     | G                | A                | 1                  | 692                | A                        |
| rs72468699   | ss102660471 | 12   | <b>c.1337A&gt;G p.His446Arg</b> | G                | A                | 2                  | 695                | A                        |

| dbSNP rs/ss# | Exon        | cDNA/Peptide | minor allele (-)                    | major allele (-) | minor allele count | total allele count | Ancestral Allele (chimp) |                |
|--------------|-------------|--------------|-------------------------------------|------------------|--------------------|--------------------|--------------------------|----------------|
| rs72468698   | ss102660470 | 12           | c.1482+25T>A                        | A                | T                  | 1                  | 695                      | T              |
| rs72468697   | ss102660469 | 13           | c.1483-125A>G                       | G                | A                  | 4                  | 681                      | A              |
| rs808542     | ss102660468 | 13           | c.1483-123G>T                       | T                | G                  | 288                | 681                      | T              |
| rs808543     | ss102660467 | 13           | c.1483-110G>A                       | A                | G                  | 287                | 682                      | A              |
| rs17309542   | ss102660466 | 13           | c.1483-72T>C                        | C                | T                  | 69                 | 685                      | T              |
| rs1435727    | ss102660465 | 13           | c.1483-67A>T                        | T                | A                  | 31                 | 685                      | A              |
| rs61733587   | ss102660464 | 13           | <b>c.1554T&gt;A p.Asp518Glu</b>     | A                | T                  | 1                  | 694                      | T              |
| rs72468696   | ss102660463 | 13           | c.1602+308delA                      | -                | A                  | 18                 | 604                      | A              |
| rs72468695   | ss102660462 | 14           | c.1603-144T>G                       | G                | T                  | 2                  | 667                      | T              |
| rs5927083    | ss102660461 | 14           | <b>c.1635A&gt;G p.Arg545</b>        | G                | A                  | 98                 | 692                      | ? <sup>3</sup> |
| rs5927082    | ss102660460 | 14           | c.1704+51T>C                        | C                | T                  | 90                 | 692                      | ? <sup>3</sup> |
| rs5972599    | ss102660459 | 15           | <b>c.1718C&gt;T p.Ala573&gt;Val</b> | T                | C                  | 1                  | 689                      | ? <sup>3</sup> |
| rs66481382   | ss102660458 | 15           | c.1812+118A>G                       | G                | A                  | 6                  | 661                      | A              |
| rs72468694   | ss102660457 | 15           | c.1812+169C>A                       | A                | C                  | 1                  | 637                      | C              |
| rs5927081    | ss102660456 | 15           | c.1812+329C>A                       | A                | C                  | 61                 | 582                      | A              |
| rs72468693   | ss102660455 | 16           | c.1813-68C>T                        | T                | C                  | 1                  | 651                      | C              |
| rs1800267    | ss102660454 | 16           | <b>c.1869C&gt;T p.Leu623</b>        | T                | C                  | 3                  | 688                      | C              |
| rs72468692   | ss102660453 | 16           | <b>c.1888A&gt;G p.Thr630Ala</b>     | G                | A                  | 2                  | 687                      | A              |
| rs72468691   | ss102660452 | 16           | c.1992+116T>G                       | G                | T                  | 2                  | 652                      | T              |
| rs6653877    | ss102660451 | 16           | c.1992+195A>T                       | T                | A                  | 18                 | 617                      | A              |
| rs115571     | ss102660450 | 17           | c.1993-37G>T                        | T                | G                  | 213                | 688                      | G              |
| rs228373     | ss102660449 | 17           | c.2168+13T>C                        | C                | T                  | 199                | 692                      | T              |
| rs1006211    | ss102660448 | 17           | c.2168+191G>C                       | C                | G                  | 272                | 654                      | C              |
| rs228372     | ss102660447 | 17           | c.2168+222G>A                       | A                | G                  | 116                | 611                      | A              |
| rs228371     | ss102660446 | 17           | c.2168+278A>G                       | G                | A                  | 85                 | 548                      | A              |

| dbSNP rs/ss# |             | Exon | cDNA/Peptide                    | minor allele (-) | major allele (-) | minor allele count | total allele count | Ancestral Allele (chimp) |
|--------------|-------------|------|---------------------------------|------------------|------------------|--------------------|--------------------|--------------------------|
| rs72468690   | ss102660445 | 18   | c.2169-306G>A                   | A                | G                | 4                  | 621                | G                        |
| rs228333     | ss102660444 | 18   | c.2169-204T>C                   | C                | T                | 129                | 611                | C                        |
| rs72468689   | ss102660443 | 18   | c.2169-96T>C                    | C                | T                | 6                  | 666                | T                        |
| rs72468688   | ss102660442 | 19   | c.2293-517del                   | -                | G                | 160                | 432                | G                        |
| rs72468687   | ss102660441 | 19   | c.2293-185C>G                   | G                | C                | 1                  | 645                | C                        |
| rs72468686   | ss102660440 | 19   | c.2293-183C>T                   | T                | C                | 1                  | 657                | C                        |
| rs72468685   | ss102660439 | 19   | c.2293-182A>G                   | G                | A                | 1                  | 659                | A                        |
| rs67750310   | ss102660438 | 19   | c.2380+47A>G                    | G                | A                | 2                  | 690                | A                        |
| rs72468684   | ss102660437 | 19   | c.2380+322del                   | -                | C                | 1                  | 609                | C                        |
| rs72468683   | ss102660436 | 20   | c.2381-278_2381-277del          | -                | AG               | 4                  | 620                | AG                       |
| rs72468682   | ss102660435 | 20   | c.2381-199A>G                   | G                | A                | 1                  | 624                | T                        |
| rs72468681   | ss102660434 | 20   | <b>c.2391T&gt;G p.Asn797Lys</b> | G                | T                | 9                  | 693                | T                        |
| rs72468680   | ss102660433 | 20   | <b>c.2457A&gt;C p.Leu819</b>    | C                | A                | 1                  | 694                | A                        |
| rs72468679   | ss102660432 | 20   | <b>c.2490C&gt;T p.Asn830</b>    | T                | C                | 1                  | 694                | C                        |
| rs72468678   | ss102660431 | 20   | c.2622+33A>G                    | G                | A                | 3                  | 690                | A                        |
| rs1545078    | ss102660430 | 21   | c.2623-503A>G                   | G                | A                | 20                 | 632                | A                        |
| rs72468677   | ss102660429 | 21   | c.2623-67C>T                    | T                | C                | 1                  | 689                | C                        |
| rs1028360    | ss102660428 | 21   | c.2623-11C>G                    | G                | C                | 5                  | 693                | C                        |
| rs228406     | ss102660427 | 21   | <b>c.2645G&gt;A p.Gly882Asp</b> | A                | G                | 222                | 693                | G                        |
| rs1028359    | ss102660426 | 21   | c.2803+167G>T                   | T                | G                | 16                 | 645                | T                        |
| rs72468676   | ss102660425 | 22   | c.2804-320G>T                   | T                | G                | 4                  | 638                | G                        |
| rs228396     | ss102660424 | 22   | c.2804-282G>C                   | C                | G                | 189                | 652                | G                        |
| rs72468675   | ss102660423 | 22   | c.2804-87A>C                    | C                | A                | 1                  | 684                | A                        |
| rs72468674   | ss102660422 | 22   | c.2949+37G>A                    | A                | G                | 1                  | 689                | G                        |
| rs72468673   | ss102660421 | 22   | c.2949+127T>G                   | G                | T                | 3                  | 670                | T                        |

| dbSNP rs/ss# |             | Exon | cDNA/Peptide                     | minor allele (-) | major allele (-) | minor allele count | total allele count | Ancestral Allele (chimp) |
|--------------|-------------|------|----------------------------------|------------------|------------------|--------------------|--------------------|--------------------------|
| rs66592193   | ss102660420 | 22   | c.2949+137A>G                    | G                | A                | 3                  | 667                | A                        |
| rs72468672   | ss102660419 | 22   | c.2949+161T>C                    | C                | T                | 4                  | 667                | T                        |
| rs72468671   | ss102660418 | 22   | c.2949+169_2949+172del           | -                | CTAT             | 1                  | 660                | CTAT                     |
| rs72468670   | ss102660417 | 22   | c.2949+254G>C                    | C                | G                | 2                  | 622                | G                        |
| rs72468669   | ss102660416 | 23   | c.2950-209A>G                    | G                | A                | 1                  | 547                | A                        |
| rs72468668   | ss102660415 | 23   | c.2950-90A>C                     | C                | A                | 4                  | 692                | A                        |
| rs72468667   | ss102660414 | 23   | <b>c.2971G&gt;C p.Glu991Gln</b>  | C                | G                | 1                  | 691                | G                        |
| rs1800268    | ss102660413 | 23   | <b>c.3021G&gt;A p.Ser1007</b>    | A                | G                | 14                 | 693                | G                        |
| rs72468666   | ss102660412 | 23   | <b>c.3030G&gt;T p.Ala1010</b>    | T                | G                | 1                  | 691                | G                        |
| rs56061889   | ss102660411 | 23   | c.3162+254T>G                    | G                | T                | 20                 | 521                | T                        |
| rs72468665   | ss102660410 | 23   | c.3162+310_3162+311dupT          | T                | -                | 70                 | 490                | -                        |
| rs72468664   | ss102660409 | 23   | c.3162+339_3162+340insT          | T                | -                | 68                 | 409                | -                        |
| rs228391     | ss102660408 | 23   | c.3162+364C>T                    | T                | C                | 204                | 653                | T                        |
| rs72468663   | ss102660407 | 24   | c.3163-59T>A                     | A                | T                | 1                  | 675                | T                        |
| rs72468662   | ss102660406 | 24   | c.3163-18T>C                     | C                | T                | 1                  | 690                | T                        |
| rs72468661   | ss102660405 | 24   | c.3276+14_3276+15del             | -                | AT               | 1                  | 688                | AT                       |
| rs61354466   | ss102660404 | 24   | c.3276+228T>C                    | C                | T                | 7                  | 683                | T                        |
| rs228388     | ss102660403 | 24   | c.3276+427C>T                    | T                | C                | 115                | 475                | C                        |
| rs228387     | ss102660402 | 25   | c.3277-345A>G                    | G                | A                | 91                 | 322                | A                        |
| rs3761608    | ss102660401 | 25   | c.3277-231T>G                    | G                | T                | 9                  | 646                | T                        |
| rs170608     | ss102660400 | 25   | c.3277-152G>A                    | A                | G                | 154                | 615                | A                        |
| rs72468660   | ss102660399 | 25   | c.3277-30C>T                     | T                | C                | 3                  | 688                | C                        |
| rs3827462    | ss102660398 | 25   | <b>c.3406A&gt;T p.Thr1136Ser</b> | T                | A                | 4                  | 689                | A                        |

| dbSNP rs/ss# |             | Exon | cDNA/Peptide                     | minor allele (-) | major allele (-) | minor allele count | total allele count | Ancestral Allele (chimp) |
|--------------|-------------|------|----------------------------------|------------------|------------------|--------------------|--------------------|--------------------------|
| rs72468659   | ss102660397 | 25   | c.3432+36C>T                     | T                | C                | 1                  | 690                | C                        |
| rs72468658   | ss102660396 | 25   | c.3432+37G>A                     | A                | G                | 1                  | 687                | G                        |
| rs1800269    | ss102660395 | 27   | <b>c.3734C&gt;T p.Thr1245Ile</b> | T                | C                | 15                 | 690                | C                        |
| rs72468657   | ss102660394 | 27   | c.3786+183T>C                    | C                | T                | 3                  | 684                | T                        |
| rs5972569    | ss102660393 | 27   | c.3786+296T>C                    | C                | T                | 259                | 541                | T                        |
| rs72468656   | ss102660392 | 28   | c.3787-18T>C                     | C                | T                | 4                  | 696                | T                        |
| rs41303185   | ss102660391 | 28   | c.3921+128C>T                    | T                | C                | 232                | 680                | C                        |
| rs66596198   | ss102660390 | 28   | c.3921+146C>G                    | G                | C                | 16                 | 659                | C                        |
| rs66809536   | ss102660389 | 28   | c.3921+271G>C                    | C                | G                | 13                 | 617                | C                        |
| rs2076366    | ss102660388 | 29   | c.3922-204C>G                    | G                | C                | 255                | 643                | C                        |
| rs66703963   | ss102660387 | 29   | c.4071+409T>G                    | G                | T                | 47                 | 280                | T                        |
| rs10521995   | ss102660386 | 30   | c.4072-737G>A                    | A                | G                | 67                 | 630                | G                        |
| rs7063700    | ss102660385 | 30   | c.4072-710T>C                    | C                | T                | 4                  | 685                | T                        |
| rs72468655   | ss102660384 | 30   | c.4072-668T>C                    | C                | T                | 1                  | 688                | C                        |
| rs72468654   | ss102660383 | 30   | c.4072-582A>T                    | T                | A                | 1                  | 685                | A                        |
| rs67778598   | ss102660382 | 30   | c.4072-541A>G                    | G                | A                | 3                  | 690                | A                        |
| rs56094071   | ss102660381 | 30   | c.4072-473T>A                    | A                | T                | 82                 | 691                | T                        |
| rs72468653   | ss102660380 | 30   | c.4072-407T>C                    | C                | T                | 4                  | 691                | T                        |
| rs16990320   | ss102660379 | 30   | c.4072-396T>A                    | A                | T                | 2                  | 689                | T                        |
| rs16990318   | ss102660378 | 30   | c.4072-389G>T                    | T                | G                | 3                  | 689                | G                        |
| rs72468652   | ss102660377 | 30   | c.4072-356A>C                    | C                | A                | 1                  | 682                | G                        |
| rs72468651   | ss102660376 | 30   | c.4072-319C>T                    | T                | C                | 1                  | 679                | C                        |
| rs72468650   | ss102660375 | 30   | c.4072-185T>A                    | A                | T                | 1                  | 693                | T                        |
| rs72468649   | ss102660374 | 30   | c.4072-136C>T                    | T                | C                | 1                  | 696                | C                        |
| rs72468648   | ss102660373 | 30   | c.4072-65C>T                     | T                | C                | 2                  | 696                | C                        |



| dbSNP rs/ss# |             | Exon | cDNA/Peptide                               | minor allele (-) | major allele (-) | minor allele count | total allele count | Ancestral Allele (chimp) |
|--------------|-------------|------|--------------------------------------------|------------------|------------------|--------------------|--------------------|--------------------------|
| rs28715870   | ss102660372 | 30   | <b>c.4162T&gt;G</b><br><b>p.Phe1388Val</b> | G                | T                | 4                  | 696                | T                        |
| rs41303181   | ss102660371 | 31   | c.4234-13A>G                               | G                | A                | 43                 | 689                | A                        |
| rs72468647   | ss102660370 | 31   | <b>c.4275A&gt;G p.Glu1425</b>              | G                | A                | 2                  | 690                | A                        |
| rs72468646   | ss102660369 | 31   | c.4344+17A>T                               | T                | A                | 2                  | 688                | A                        |
| rs72468645   | ss102660368 | 31   | c.4344+29G>A                               | A                | G                | 1                  | 690                | G                        |
| rs72468644   | ss102660367 | 31   | c.4344+39T>A                               | A                | T                | 1                  | 690                | T                        |
| rs72468643   | ss102660366 | 32   | c.4345-39G>C                               | C                | G                | 2                  | 693                | G                        |
| rs72468642   | ss102660365 | 32   | c.4518+78_4518+79dup                       | (AG)2            | (AG)3            | 1                  | 653                | (AG)3                    |
| rs67653684   | ss102660364 | 33   | c.4519-319A>G                              | G                | A                | 78                 | 661                | A                        |
| rs72468641   | ss102660363 | 33   | c.4519-264_4519-263dup                     | (AT)7            | (AT)6            | 256                | 526                | (AT)6                    |
| rs16990296   | ss102660362 | 33   | c.4519-136C>T                              | T                | C                | 74                 | 635                | C                        |
| rs72468640   | ss102660361 | 33   | c.4519-95A>C                               | C                | A                | 2                  | 648                | A                        |
| rs72468639   | ss102660360 | 33   | c.4519-34T>A                               | A                | T                | 5                  | 696                | T                        |
| rs72468638   | ss102660359 | 33   | <b>c.4529A&gt;G</b><br><b>p.Lys1510Arg</b> | G                | A                | 1                  | 697                | A                        |
| rs66989299   | ss102660358 | 33   | c.4674+71A>G                               | G                | A                | 1                  | 694                | A                        |
| rs12837503   | ss102660357 | 33   | c.4674+178T>C                              | C                | T                | 12                 | 694                | T                        |
| rs57969988   | ss102660356 | 33   | c.4674+270A>G                              | G                | A                | 81                 | 684                | A                        |
| rs16990293   | ss102660355 | 33   | c.4674+275C>G                              | G                | C                | 80                 | 684                | T                        |
| rs16998283   | ss102660354 | 34   | c.4675-370T>C                              | C                | T                | 33                 | 476                | ? <sup>3</sup>           |
| rs16998281   | ss102660353 | 34   | c.4675-342G>A                              | A                | G                | 52                 | 547                | ? <sup>3</sup>           |
| rs72468637   | ss102660352 | 34   | c.4675-79A>G                               | G                | A                | 1                  | 688                | ? <sup>3</sup>           |
| rs72468636   | ss102660351 | 34   | c.4675-53G>T                               | T                | G                | 5                  | 693                | ? <sup>3</sup>           |
| rs72468635   | ss102660350 | 34   | c.4845+69G>A                               | A                | G                | 2                  | 688                | T                        |
| rs5927976    | ss102660349 | 35   | c.4846-153A>G                              | G                | A                | 217                | 638                | A                        |

| dbSNP rs/ss# |             | Exon | cDNA/Peptide                               | minor allele (-) | major allele (-) | minor allele count | total allele count | Ancestral Allele (chimp) |
|--------------|-------------|------|--------------------------------------------|------------------|------------------|--------------------|--------------------|--------------------------|
| rs72468634   | ss102660348 | 35   | <b>c.4877T&gt;A</b><br><b>p.Val1626Glu</b> | A                | T                | 1                  | 697                | T                        |
| rs61733574   | ss102660347 | 35   | <b>c.4878G&gt;T p.Val1626</b>              | T                | G                | 2                  | 697                | G                        |
| rs16990264   | ss102660346 | 35   | <b>c.5016T&gt;A</b><br><b>p.Asn1672Lys</b> | A                | T                | 2                  | 697                | T                        |
| rs5927975    | ss102660345 | 35   | c.5025+103G>A                              | A                | G                | 331                | 678                | A                        |
| rs55676629   | ss102660344 | 36   | c.5026-93A>G                               | G                | A                | 19                 | 681                | A                        |
| rs72468633   | ss102660343 | 36   | c.5026-59A>G                               | G                | A                | 1                  | 688                | A                        |
| rs72468632   | ss102660342 | 36   | <b>c.5040C&gt;T p.His1680</b>              | T                | C                | 1                  | 692                | C                        |
| rs5972544    | ss102660341 | 37   | c.5155-412C>A                              | A                | C                | 268                | 662                | C                        |
| rs12387861   | ss102660340 | 37   | c.5155-63T>A                               | A                | T                | 9                  | 698                | A                        |
| rs72468631   | ss102660339 | 37   | c.5155-16T>A                               | A                | T                | 1                  | 695                | T                        |
| rs72468630   | ss102660338 | 37   | <b>c.5163G&gt;C</b><br><b>p.Lys1721Asn</b> | C                | G                | 1                  | 697                | G                        |
| rs34102501   | ss102660337 | 37   | <b>c.5182C&gt;T</b><br><b>p.Arg1728Cys</b> | T                | C                | 1                  | 696                | C                        |
| rs1801187    | ss102660336 | 37   | <b>c.5234G&gt;A</b><br><b>p.Arg1745His</b> | A                | G                | 329                | 695                | G                        |
| rs72468629   | ss102660335 | 37   | c.5325+206C>T                              | T                | C                | 1                  | 666                | T                        |
| rs72468628   | ss102660334 | 38   | c.5326-258A>C                              | C                | A                | 16                 | 664                | A                        |
| rs41309607   | ss102660333 | 38   | c.5326-54A>C                               | C                | A                | 11                 | 693                | A                        |
| rs72468627   | ss102660332 | 38   | c.5326-22G>T                               | T                | G                | 6                  | 693                | T                        |
| rs72468626   | ss102660331 | 38   | c.5448+67A>G                               | G                | A                | 1                  | 690                | A                        |
| rs72468625   | ss102660330 | 38   | c.5448+148G>T                              | T                | G                | 4                  | 664                | A                        |
| rs331309     | ss102660329 | 38   | c.5448+169T>A                              | A                | T                | 171                | 663                | A                        |
| rs926953     | ss102660328 | 39   | c.5449-463G>A                              | A                | G                | 308                | 664                | A                        |
| rs72468624   | ss102660327 | 39   | c.5449-117T>C                              | C                | T                | 6                  | 695                | T                        |

| dbSNP rs/ss# |             | Exon | cDNA/Peptide                               | minor allele (-) | major allele (-) | minor allele count | total allele count | Ancestral Allele (chimp) |
|--------------|-------------|------|--------------------------------------------|------------------|------------------|--------------------|--------------------|--------------------------|
| rs72468623   | ss102660326 | 39   | c.5586+30G>A                               | A                | G                | 4                  | 695                | G                        |
| rs72468622   | ss102660325 | 39   | c.5586+52A>G                               | G                | A                | 2                  | 695                | A                        |
| rs72468621   | ss102660324 | 39   | c.5586+96_5586+97del                       | -                | TC               | 159                | 687                | -                        |
| rs1325579    | ss102660323 | 39   | c.5586+238A>G                              | G                | A                | 226                | 601                | A                        |
| rs1456733    | ss102660322 | 40   | c.5587-402C>T                              | T                | C                | 199                | 685                | T                        |
| rs72468620   | ss102660321 | 40   | c.5587-340T>G                              | G                | T                | 3                  | 620                | T                        |
| rs1456732    | ss102660320 | 40   | c.5587-308T>G                              | G                | T                | 170                | 613                | T                        |
| rs1456731    | ss102660319 | 40   | c.5587-306C>A                              | A                | C                | 210                | 573                | A                        |
| rs72468619   | ss102660318 | 40   | c.5587-229A>G                              | G                | A                | 6                  | 650                | A                        |
| rs72468618   | ss102660317 | 40   | c.5587-85C>T                               | T                | C                | 1                  | 690                | C                        |
| rs72468617   | ss102660316 | 40   | c.5739+39T>A                               | A                | T                | 3                  | 688                | T                        |
| rs72468616   | ss102660315 | 40   | c.5739+162_5739+1165del                    | -                | AAGT             | 1                  | 632                | AAGT                     |
| rs7891425    | ss102660314 | 40   | c.5739+218G>A                              | A                | G                | 99                 | 639                | A                        |
| rs6527184    | ss102660313 | 41   | c.5740-67G>T                               | T                | G                | 57                 | 630                | G                        |
| rs72468615   | ss102660312 | 41   | c.5922+16C>G                               | G                | C                | 1                  | 679                | C                        |
| rs72468614   | ss102660311 | 41   | c.5922+76_5922+77dup                       | (A)10            | (A)8             | 286                | 672                | (A)8                     |
| rs58019410   | ss102660310 | 42   | c.5923-212A>G                              | G                | A                | 5                  | 627                | A                        |
| rs6631543    | ss102660309 | 42   | c.5923-179A>G                              | G                | A                | 246                | 643                | G                        |
| rs72468613   | ss102660308 | 42   | <b>c.6028G&gt;T</b><br><b>p.Ala2010Ser</b> | T                | G                | 1                  | 697                | G                        |
| rs5927072    | ss102660307 | 42   | c.6117+383C>T                              | T                | C                | 23                 | 104                | T                        |
| rs72468612   | ss102660306 | 43   | c.6118-63A>T                               | T                | A                | 9                  | 680                | T                        |
| rs3788896    | ss102660304 | 43   | c.6290+27T>A                               | A                | T                | 43                 | 698                | T                        |
| rs72468610   | ss102660303 | 43   | c.6290+92dupA                              | A                | -                | 8                  | 689                | -                        |
| rs72468609   | ss102660302 | 44   | c.6291-179G>A                              | A                | G                | 8                  | 626                | G                        |

| dbSNP rs/ss# | Exon        | cDNA/Peptide   | minor allele (-)                           | major allele (-) | minor allele count | total allele count | Ancestral Allele (chimp) |                |
|--------------|-------------|----------------|--------------------------------------------|------------------|--------------------|--------------------|--------------------------|----------------|
| rs3747400    | ss102660301 | 44             | c.6291-115G>A                              | A                | G                  | 119                | 634                      | A              |
| rs72468608   | ss102660300 | 44             | c.6291-102G>A                              | A                | G                  | 7                  | 655                      | G              |
| rs16990169   | ss102660299 | 44             | <b>c.6322C&gt;T</b><br><b>p.Arg2108Cys</b> | T                | C                  | 1                  | 693                      | C              |
| rs72468607   | ss102660298 | 44             | c.6438+120_6438+122dup                     | (CAT)1           | (CAT)2             | 1                  | 675                      | ? <sup>3</sup> |
| rs1718050    | ss102660296 | 1 <sup>4</sup> | c.1-381658A>G <sup>4</sup>                 | G                | A                  | 232                | 677                      | A              |
| rs72468605   | ss102660295 | 1 <sup>4</sup> | c.1-381564T>C <sup>4</sup>                 | C                | T                  | 1                  | 684                      | T              |
| rs55672607   | ss102660294 | 1 <sup>4</sup> | c.1-381429A>G <sup>4</sup>                 | G                | A                  | 50                 | 684                      | A              |
| rs72468604   | ss102660293 | 1 <sup>4</sup> | c.1-381220C>T <sup>4</sup>                 | T                | C                  | 1                  | 650                      | C              |
| rs3761605    | ss102660292 | 45             | c.6439-143G>A                              | A                | G                  | 189                | 624                      | G              |
| rs67729860   | ss102660291 | 45             | c.6439-38G>A                               | A                | G                  | 2                  | 688                      | G              |
| rs1800273    | ss102660290 | 45             | <b>c.6463C&gt;T</b><br><b>p.Arg2155Trp</b> | T                | C                  | 35                 | 685                      | C              |
| rs72468603   | ss102660289 | 45             | c.6614+13A>T                               | T                | A                  | 1                  | 685                      | A              |
| rs3761604    | ss102660288 | 45             | c.6614+26G>T                               | T                | G                  | 210                | 684                      | G              |
| rs72466602   | ss102660287 | 45             | c.6614+119A>G                              | G                | A                  | 1                  | 683                      | A              |
| rs72466601   | ss102660286 | 45             | c.6614+166delT                             | -                | T                  | 1                  | 674                      | T              |
| rs72466600   | ss102660285 | 45             | c.6614+186T>C                              | C                | T                  | 1                  | 659                      | T              |
| rs72466599   | ss102660284 | 45             | c.6614+237_6614+240del                     | -                | AAAT               | 2                  | 651                      | AAAT           |
| rs72466598   | ss102660283 | 46             | c.6615-58A>C                               | C                | A                  | 5                  | 684                      | ? <sup>3</sup> |
| rs16989970   | ss102660282 | 46             | c.6762+141C>T                              | T                | C                  | 33                 | 675                      | ? <sup>3</sup> |
| rs72466597   | ss102660281 | 46             | c.6762+184T>C                              | C                | T                  | 30                 | 672                      | T              |
| rs72466596   | ss102660280 | 47             | c.6763-97C>T                               | T                | C                  | 2                  | 678                      | C              |
| rs72466595   | ss102660279 | 47             | <b>c.6828C&gt;T p.Pro2276</b>              | T                | C                  | 1                  | 694                      | C              |

<sup>4</sup> NM\_004013.1, Dp140 Isoform

| dbSNP rs/ss# |             | Exon | cDNA/Peptide                               | minor allele (-) | major allele (-) | minor allele count | total allele count | Ancestral Allele (chimp) |
|--------------|-------------|------|--------------------------------------------|------------------|------------------|--------------------|--------------------|--------------------------|
| rs72466594   | ss102660278 | 47   | c.6912+128_6912+132dup                     | (GTTTT)4         | (GTTTT)3         | 21                 | 602                | (GTTTT)<br>3             |
| rs72466593   | ss102660277 | 47   | c.6912+141G>A                              | A                | G                | 1                  | 624                | G                        |
| rs72466592   | ss102660276 | 47   | c.6912+366del                              | -                | A                | 33                 | 537                | A                        |
| rs45618538   | ss102660275 | 48   | c.6913-114A>T                              | T                | A                | 86                 | 671                | A                        |
| rs1800275    | ss102660274 | 48   | <b>c.7096A&gt;C</b><br><b>p.Lys2366Gln</b> | C                | A                | 121                | 678                | A                        |
| rs5972454    | ss102660273 | 48   | c.7098+156G>C                              | C                | G                | 225                | 656                | G                        |
| rs7880185    | ss102660272 | 49   | c.7099-373T>G                              | G                | T                | 73                 | 494                | T                        |
| rs72466591   | ss102660271 | 49   | c.7099-20A>G                               | G                | A                | 2                  | 682                | A                        |
| rs72466590   | ss102660270 | 49   | <b>c.7183G&gt;A</b><br><b>p.Ala2395Thr</b> | A                | G                | 2                  | 678                | G                        |
| rs72466589   | ss102660269 | 49   | c.7200+26C>T                               | T                | C                | 1                  | 682                | C                        |
| rs72466588   | ss102660268 | 49   | c.7200+51T>A                               | A                | T                | 1                  | 681                | T                        |
| rs1379871    | ss102660267 | 49   | c.7200+53C>G                               | G                | C                | 230                | 675                | C                        |
| rs5927044    | ss102660266 | 50   | c.7201-159A>C                              | C                | A                | 83                 | 644                | A                        |
| rs72466587   | ss102660265 | 50   | c.7309+134+7309+135del                     | -                | TG               | 1                  | 611                | TG                       |
| rs17341004   | ss102660264 | 50   | c.7309+176T>C                              | C                | T                | 84                 | 563                | T                        |
| rs5927855    | ss102660263 | 51   | c.7310-250C>T                              | T                | C                | 69                 | 566                | C                        |
| rs72466586   | ss102660262 | 51   | c.7310-36C>T                               | T                | C                | 10                 | 675                | C                        |
| rs72466585   | ss102660261 | 51   | c.7542+13A>G                               | G                | A                | 6                  | 438                | A                        |
| rs72466584   | ss102660260 | 52   | c.7543-159T>G                              | G                | T                | 1                  | 640                | T                        |
| rs5927823    | ss102660259 | 52   | c.7543-156C>G                              | G                | C                | 95                 | 653                | C                        |
| rs72466583   | ss102660258 | 52   | c.7660+125del                              | -                | A                | 1                  | 672                | A                        |
| rs72466582   | ss102660257 | 53   | c.7661-61T>A                               | A                | T                | 12                 | 687                | T                        |
| rs1801188    | ss102660256 | 53   | <b>c.7728T&gt;C</b> <b>p.Asn2576</b>       | C                | T                | 137                | 688                | T                        |

| dbSNP rs/ss# |             | Exon           | cDNA/Peptide                               | minor allele (-) | major allele (-) | minor allele count | total allele count | Ancestral Allele (chimp) |
|--------------|-------------|----------------|--------------------------------------------|------------------|------------------|--------------------|--------------------|--------------------------|
| rs72466581   | ss102660255 | 53             | <b>c.7820A&gt;T</b><br><b>p.Lys2607Met</b> | T                | A                | 1                  | 686                | A                        |
| rs5927803    | ss102660254 | 53             | c.7872+324G>A                              | A                | G                | 219                | 570                | A                        |
| rs72466580   | ss102660253 | 54             | c.8027+7A>T                                | T                | A                | 1                  | 685                | A                        |
| rs2270672    | ss102660252 | 54             | c.8027+11C>T                               | T                | C                | 225                | 685                | C                        |
| rs72466579   | ss102660251 | 55             | c.8028-114C>A                              | A                | C                | 1                  | 678                | C                        |
| rs72466578   | ss102660250 | 55             | c.8028-42C>G                               | G                | C                | 1                  | 684                | C                        |
| rs16989681   | ss102660249 | 1 <sup>5</sup> | c.1-285G>A <sup>5</sup>                    | A                | G                | 113                | 683                | A                        |
| rs72466577   | ss102660248 | 1 <sup>5</sup> | c.1-272delA <sup>5</sup>                   | -                | A                | 1                  | 683                | A                        |
| rs72466576   | ss102660247 | 1 <sup>5</sup> | c.1-187T>A <sup>5</sup>                    | A                | T                | 1                  | 684                | T                        |
| rs3788893    | ss102660246 | 1 <sup>5</sup> | c.30+125G>A <sup>5</sup>                   | A                | G                | 98                 | 609                | A                        |
| rs72466575   | ss102660245 | 56             | <b>c.8322G&gt;T</b> <b>p.Leu2774</b>       | T                | G                | 2                  | 693                | G                        |
| rs3788892    | ss102660244 | 56             | c.8390+174T>C                              | C                | T                | 7                  | 690                | T                        |
| rs7058685    | ss102660243 | 56             | c.8390+422C>T                              | T                | C                | 132                | 625                | T                        |
| rs62588956   | ss102660242 | 56             | c.8390+443G>A                              | A                | G                | 34                 | 618                | G                        |
| rs5927759    | ss102660241 | 57             | c.8391-287T>C                              | C                | T                | 168                | 545                | C                        |
| rs5972392    | ss102660240 | 57             | c.8391-109A>G                              | G                | A                | 3                  | 658                | A                        |
| rs72466574   | ss102660239 | 57             | <b>c.8496A&gt;C</b> <b>p.Ala2832</b>       | C                | A                | 1                  | 689                | A                        |
| rs6418632    | ss102660238 | 57             | c.8547+153C>T                              | T                | C                | 185                | 680                | T                        |
| rs72466573   | ss102660237 | 57             | c.8547+225A>T                              | T                | A                | 3                  | 660                | A                        |
| rs72466572   | ss102660236 | 58             | c.8548-250A>G                              | G                | A                | 26                 | 673                | A                        |
| rs72466571   | ss102660235 | 58             | c.8548-249T>C                              | C                | T                | 17                 | 673                | T                        |
| rs17338590   | ss102660234 | 58             | c.8548-149A>G                              | G                | A                | 12                 | 655                | A                        |
| rs72466570   | ss102660233 | 58             | <b>c.8571T&gt;C</b> <b>p.Thr2857</b>       | C                | T                | 3                  | 696                | T                        |
| rs72466569   | ss102660232 | 58             | <b>c.8579C&gt;A</b>                        | A                | C                | 1                  | 696                | C                        |

<sup>5</sup> NM\_004014 .1, Dp116 Isoform

| dbSNP rs/ss#        | Exon        | cDNA/Peptide                                  | minor allele (-) | major allele (-) | minor allele count | total allele count | Ancestral Allele (chimp) |
|---------------------|-------------|-----------------------------------------------|------------------|------------------|--------------------|--------------------|--------------------------|
| <b>p.Pro2860His</b> |             |                                               |                  |                  |                    |                    |                          |
| rs66517855          | ss102660231 | 58 c.8668+209C>T                              | T                | C                | 42                 | 683                | T                        |
| rs72466568          | ss102660230 | 59 c.8669-85C>T                               | T                | C                | 2                  | 678                | C                        |
| rs17338583          | ss102660229 | 59 c.8669-75C>G                               | G                | C                | 57                 | 690                | C                        |
| rs41305353          | ss102660228 | 59 <b>c.8729A&gt;T</b><br><b>p.Glu2910Val</b> | T                | A                | 11                 | 696                | A                        |
| rs1800278           | ss102660227 | 59 <b>c.8734A&gt;G</b><br><b>p.Asn2912Asp</b> | G                | A                | 11                 | 696                | A                        |
| rs1800279           | ss102660226 | 59 <b>c.8762A&gt;G</b><br><b>p.His2921Arg</b> | G                | A                | 24                 | 696                | A                        |
| rs1800280           | ss102660225 | 59 <b>c.8810A&gt;G</b><br><b>p.Gln2937Arg</b> | G                | A                | 49                 | 694                | A                        |
| rs72466567          | ss102660224 | 59 <b>c.8852G&gt;A</b><br><b>p.Arg2951His</b> | A                | G                | 1                  | 693                | G                        |
| rs72466566          | ss102660223 | 59 c.8937+198T>C                              | C                | T                | 23                 | 625                | T                        |
| rs67957153          | ss102660222 | 60 c.8938-431G>A                              | A                | G                | 15                 | 335                | G                        |
| rs72466565          | ss102660221 | 60 c.9084+66A>C                               | C                | A                | 1                  | 691                | A                        |
| rs6631295           | ss102660220 | 61 c.9085-431T>C                              | C                | T                | 177                | 669                | T                        |
| rs72466564          | ss102660219 | 61 c.9085-70G>T                               | T                | G                | 1                  | 693                | G                        |
| rs72466563          | ss102660218 | 61 <b>c.9093C&gt;T p.Val3031</b>              | T                | C                | 1                  | 692                | C                        |
| rs72466562          | ss102660217 | 61 <b>c.9094G&gt;A</b><br><b>p.Glu3032Lys</b> | A                | G                | 1                  | 692                | G                        |
| rs72466561          | ss102660216 | 61 c.9163+38C>A                               | A                | C                | 1                  | 690                | C                        |
| rs6628596           | ss102660215 | 61 c.9163+189G>T                              | T                | G                | 157                | 644                | G                        |
| rs7059188           | ss102660214 | 62 c.9164-145A>G                              | G                | A                | 10                 | 644                | A                        |
| rs72466560          | ss102660213 | 62 c.9224+151C>A                              | A                | C                | 1                  | 696                | C                        |
| rs7053818           | ss102660212 | 62 c.9224+264T>A                              | A                | T                | 7                  | 636                | T                        |
| rs72466559          | ss102660211 | 62 c.9224+265A>G                              | G                | A                | 1                  | 605                | A                        |

| dbSNP rs/ss# |             | Exon | cDNA/Peptide   | minor allele (-) | major allele (-) | minor allele count | total allele count | Ancestral Allele (chimp) |
|--------------|-------------|------|----------------|------------------|------------------|--------------------|--------------------|--------------------------|
| rs17338423   | ss102660210 | 63   | c.9225-138A>G  | G                | A                | 120                | 668                | A                        |
| rs72466558   | ss102660209 | 63   | c.9286+52A>T   | T                | A                | 1                  | 694                | A                        |
| rs72466557   | ss102660208 | 64   | c.9287-119A>G  | G                | A                | 1                  | 672                | A                        |
| rs10127360   | ss102660207 | 64   | c.9361+138T>C  | C                | T                | 221                | 639                | T                        |
| rs16989449   | ss102660206 | 64   | c.9361+259G>T  | T                | G                | 61                 | 610                | G                        |
| rs5972341    | ss102660205 | 64   | c.9361+364A>G  | G                | A                | 217                | 635                | A                        |
| rs72466556   | ss102660204 | 64   | c.9361+383C>T  | T                | C                | 1                  | 471                | C                        |
| rs72466555   | ss102660203 | 65   | c.9362-114T>C  | C                | T                | 1                  | 657                | T                        |
| rs72466554   | ss102660202 | 65   | c.9563+27G>A   | A                | G                | 2                  | 694                | G                        |
| rs72466553   | ss102660201 | 65   | c.9563+68G>A   | A                | G                | 1                  | 695                | G                        |
| rs5927704    | ss102660200 | 66   | c.9564-287C>T  | T                | C                | 75                 | 664                | T                        |
| rs72466552   | ss102660199 | 66   | c.9564-286G>A  | A                | G                | 22                 | 667                | G                        |
| rs72466551   | ss102660198 | 66   | c.9564-267A>G  | G                | A                | 2                  | 665                | A                        |
| rs2293666    | ss102660197 | 66   | c.9564-210C>T  | T                | C                | 73                 | 673                | T                        |
| rs2293667    | ss102660196 | 66   | c.9564-97T>C   | C                | T                | 73                 | 690                | T                        |
| rs2293668    | ss102660195 | 66   | c.9649+15C>T   | T                | C                | 72                 | 690                | C                        |
| rs72466550   | ss102660194 | 66   | c.9649+86A>T   | T                | A                | 1                  | 683                | A                        |
| rs5927701    | ss102660193 | 67   | c.9650-342G>A  | A                | G                | 131                | 423                | A                        |
| rs67403730   | ss102660192 | 67   | c.9650-158A>C  | C                | A                | 5                  | 618                | A                        |
| rs72466549   | ss102660191 | 67   | c.9650-64C>T   | T                | C                | 3                  | 688                | C                        |
| rs72466548   | ss102660190 | 67   | c.9807+63A>G   | G                | A                | 1                  | 696                | A                        |
| rs72466547   | ss102660189 | 67   | c.9807+139G>T  | T                | G                | 1                  | 689                | G                        |
| rs5926992    | ss102660188 | 67   | c.9807+218C>G  | G                | C                | 27                 | 690                | C                        |
| rs72466546   | ss102660187 | 67   | c.9807+423delT | -                | T                | 168                | 451                | -                        |
| rs72466544   | ss102660185 | 69   | c.9975-460A>G  | G                | A                | 14                 | 676                | G                        |



| dbSNP rs/ss# |             | Exon | cDNA/Peptide                   | minor allele (-) | major allele (-) | minor allele count | total allele count | Ancestral Allele (chimp) |
|--------------|-------------|------|--------------------------------|------------------|------------------|--------------------|--------------------|--------------------------|
| rs72466543   | ss102660184 | 69   | c.9975-111A>G                  | G                | A                | 1                  | 688                | A                        |
| rs12558839   | ss102660183 | 69   | c.9975-79G>A                   | A                | G                | 4                  | 696                | G                        |
| rs5927693    | ss102660182 | 69   | c.10086+283C>T                 | T                | C                | 246                | 573                | T                        |
| rs72466542   | ss102660181 | 70   | c.10087-139C>G                 | G                | C                | 2                  | 695                | C                        |
| rs72466541   | ss102660180 | 70   | c.10087-24A>G                  | G                | A                | 1                  | 695                | A                        |
| rs41303187   | ss102660179 | 70   | c.10087-20C>T                  | T                | C                | 3                  | 695                | C                        |
| rs16989418   | ss102660178 | 71   | c.10224-101T>C                 | C                | T                | 1                  | 696                | T                        |
| rs12391957   | ss102660177 | 72   | c.10263-411T>C                 | C                | T                | 122                | 624                | T                        |
| rs2404496    | ss102660176 | 72   | c.10328+67A>G                  | G                | A                | 102                | 691                | A                        |
| rs72466540   | ss102660175 | 72   | c.10328+158A>G                 | G                | A                | 1                  | 668                | A                        |
| rs2404495    | ss102660174 | 72   | c.10328+379T>C                 | C                | T                | 81                 | 497                | C                        |
| rs3788884    | ss102660173 | 72   | c.10328+501T>C                 | C                | T                | 6                  | 323                | T                        |
| rs2896876    | ss102660172 | 74   | c.10395-178A>G                 | G                | A                | 97                 | 640                | A                        |
| rs72466539   | ss102660171 | 75   | c.10554-37_10554-34ins         | CTTT             | -                | 124                | 670                | -                        |
| rs72466538   | ss102660170 | 75   | <b>c.10620G&gt;A p.Pro3540</b> | A                | G                | 1                  | 681                | G                        |
| rs1800281    | ss102660169 | 75   | <b>c.10789C&gt;T p.Leu3597</b> | T                | C                | 7                  | 683                | C                        |
| rs72466537   | ss102660168 | 75   | c.10797+42C>G                  | G                | C                | 8                  | 647                | C                        |
| rs1484852    | ss102660167 | 75   | c.10797+82G>A                  | A                | G                | 94                 | 611                | G                        |
| rs3816796    | ss102660166 | 75   | c.10797+135A>G                 | G                | A                | 21                 | 642                | A                        |
| rs61037625   | ss102660165 | 76   | c.10798-171T>A                 | A                | T                | 8                  | 636                | A                        |
| rs59170794   | ss102660164 | 76   | c.10798-110A>C                 | C                | A                | 8                  | 670                | A                        |
| rs17340575   | ss102660163 | 76   | c.10798-100G>C                 | C                | G                | 6                  | 674                | G                        |
| rs72466536   | ss102660162 | 76   | c.10921+133C>T                 | T                | C                | 3                  | 688                | T                        |
| rs7066986    | ss102660161 | 76   | c.10921+183A>G                 | G                | A                | 16                 | 602                | A                        |
| rs72466535   | ss102660160 | 76   | c.10921+236C>T                 | T                | C                | 9                  | 554                | C                        |

| dbSNP rs/ss# |             | Exon | cDNA/Peptide                                    | minor allele (-)          | major allele (-) | minor allele count | total allele count | Ancestral Allele (chimp) |
|--------------|-------------|------|-------------------------------------------------|---------------------------|------------------|--------------------|--------------------|--------------------------|
| rs72466534   | ss102660159 | 77   | c.11014+65A>G                                   | G                         | A                | 2                  | 680                | A                        |
| rs72466532   | ss102660157 | 78   | c.11046+119A>G                                  | G                         | A                | 3                  | 651                | A                        |
| rs436628     | ss102660156 | 79   | c.11047-249A>T                                  | T                         | A                | 150                | 663                | A                        |
| rs72466531   | ss102660155 | 79   | c.11058+924_11058+925 dup                       | ACAA                      | -                | 1                  | 697                | -                        |
| rs72466530   | ss102660154 | 79   | c.11058+968dupT                                 | T                         | -                | 2                  | 697                | ? <sup>3</sup>           |
| rs72466529   | ss102660153 | 79   | c.11058+1048_11058+1046dup                      | GAT                       | -                | 3                  | 697                | -                        |
| rs72466527   | ss102660151 | 79   | c.11058+1245_11058+1248dup                      | CTTT                      | -                | 1                  | 697                | -                        |
| rs3361       | ss102660150 | 79   | c.11058+1447A>G                                 | G                         | A                | 166                | 697                | G                        |
| rs72466526   | ss102660149 | 79   | c.11058+1565_11058+1566insAAAG                  | AAAG                      | -                | 25                 | 697                | -                        |
| rs72466525   | ss102660148 | 79   | c.11058+1591_11058+1594dup                      | TGTT                      | -                | 4                  | 697                | -                        |
| rs72466524   | ss102660147 | 79   | c.11058+1758_11058+1762del                      | -                         | TTCAT            | 5                  | 696                | TTCAT                    |
| rs7886658    | ss102660146 | 79   | c.11058+1783A>G                                 | G                         | A                | 6                  | 696                | A                        |
| rs72466523   | ss102660145 | 79   | c.11058+2039C>A                                 | A                         | C                | 4                  | 697                | ? <sup>3</sup>           |
| rs72466522   | ss102660144 | 79   | c.11058+2153_11058+2154insATGTGACGCTGG<br>ACCTT | ATGTGA<br>CGCTGG<br>ACCTT | -                | 3                  | 696                | -                        |
| rs72466521   | ss102660143 | 79   | c.11058+2237_11058+2240dup                      | AAGT                      | -                | 11                 | 696                | -                        |
| rs72466520   | ss102660142 | 79   | c.11058+2581_11058+2584dup                      | ACTT                      | -                | 1                  | 695                | -                        |
| rs72466519   | ss102660141 | 79   | c.11058+2760_11058+2763del                      | -                         | ACTT             | 77                 | 695                | ACTT                     |
| rs72466518   | ss102660140 | 79   | c.11058+2771_11058+2774dup                      | AATA                      | -                | 4                  | 695                | -                        |

**Supp. Table S5.** Variable Nucleotide Repeats in the DMD gene observed by SCAIP analysis.

| dbSNP ss#   | Relative Exon | cDNA         | Allele (Unit)Count | Allele Count | Allele Frequency |
|-------------|---------------|--------------|--------------------|--------------|------------------|
| ss102660519 | 4             | c.264+361    | (TTTTC)5           | 391          | 75.0%            |
|             |               |              | (TTTTC)4           | 126          | 24.2%            |
|             |               |              | (TTTTC)6           | 4            | 0.8%             |
| ss102660305 | 43            | c.6118-61    | (AT)7              | 549          | 82.7%            |
|             |               |              | (AT)8              | 104          | 15.7%            |
|             |               |              | (AT)6              | 9            | 1.4%             |
|             |               |              | (AT)9              | 2            | 0.3%             |
| ss102660297 | 44            | c.6438+60942 | (GT)22             | 297          | 90.3%            |
|             |               |              | (GT)17             | 20           | 6.1%             |
|             |               |              | (GT)14             | 9            | 2.7%             |
|             |               |              | (GT)21             | 2            | 0.6%             |
|             |               |              | (GT)18             | 1            | 0.3%             |
| ss102660186 | 68            | c.9974+23    | (A)11              | 333          | 49.8%            |
|             |               |              | (A)10              | 287          | 42.9%            |
|             |               |              | (A)9               | 49           | 7.3%             |
| ss102660158 | 78            | c.11015-44   | (T)8               | 683          | 98.7%            |
|             |               |              | (T)7               | 8            | 1.2%             |
|             |               |              | (T)9               | 1            | 0.1%             |

| dbSNP ss#   | Relative Exon | cDNA         | Allele (Unit)Count       | Allele Count | Allele Frequency |
|-------------|---------------|--------------|--------------------------|--------------|------------------|
| -           | 79            | c.11058+463  | (CA)8(TACA)1(CA)6        | 471          | 77.5%            |
|             |               |              | (CA)8(TACA)2(CA)6        | 106          | 17.4%            |
|             |               |              | (CA)12                   | 14           | 2.3%             |
|             |               |              | (CA)9                    | 4            | 0.7%             |
|             |               |              | (CA)8(TACA)1(CA)5        | 2            | 0.3%             |
|             |               |              | (CA)10                   | 2            | 0.3%             |
|             |               |              | (CA)8(TACA)1(CA)4(TACA)1 | 2            | 0.3%             |
|             |               |              | (CA)3(TACA)1(CA)6        | 2            | 0.3%             |
|             |               |              | (CA)16                   | 1            | 0.2%             |
|             |               |              | (CA)3(TACA)1(CA)11       | 1            | 0.2%             |
|             |               |              | (CA)8(TACA)2(CA)7        | 1            | 0.2%             |
|             |               |              | (CA)8(TACA)1(CA)8        | 1            | 0.2%             |
|             |               |              | (CA)13                   | 1            | 0.2%             |
| ss102660152 | 79            | c.11058+1068 | TGAT(5)                  | 588          | 84.4%            |
|             |               |              | TGAT(6)                  | 100          | 14.3%            |
|             |               |              | TGAT(4)                  | 9            | 1.3%             |

**Supp. Table S6.** Mono Exon Skipping Summary by Mutation Class and Patient.

Number of patients predicted to benefit from skipping an individual exon are noted in parentheses.

| Exon Skipped | Mutation Class (# of Patients)                      |             |            |
|--------------|-----------------------------------------------------|-------------|------------|
|              | Deletion                                            | Duplication | Point      |
| Ex1          |                                                     |             |            |
| Ex2          | ex03ex07del(26)                                     | ex02dup(15) |            |
| Ex3          |                                                     |             | ex03pt(3)  |
| Ex4          |                                                     |             | ex04pt(2)  |
| Ex5          |                                                     |             | ex05pt(5)  |
| Ex6          |                                                     |             |            |
| Ex7          | ex08ex11del(5)<br>ex08ex43del(4)<br>ex08ex45del(1)  | ex07dup(1)  |            |
| Ex8          | ex03ex07del(26)<br>ex05ex07del(5)<br>ex06ex07del(1) | ex08dup(1)  |            |
| Ex9          |                                                     |             | ex09pt(2)  |
| Ex10         |                                                     |             | ex10pt(6)  |
| Ex11         | ex12ex25del(2)<br>ex12ex41del(1)<br>ex12del(1)      |             |            |
| Ex12         | ex10ex11del(5)<br>ex03ex11del(2)<br>ex06ex11del(1)  | ex12dup(1)  |            |
| Ex13         |                                                     |             | ex13pt(2)  |
| Ex14         |                                                     |             | ex14pt(10) |
| Ex15         |                                                     |             | ex15pt(4)  |
| Ex16         |                                                     |             | ex16pt(6)  |

| Exon Skipped | Mutation Class (# of Patients)                                                                                                           |             |            |
|--------------|------------------------------------------------------------------------------------------------------------------------------------------|-------------|------------|
|              | Deletion                                                                                                                                 | Duplication | Point      |
| Ex17         | ex18del(5)<br>ex18ex39del(3)<br>ex18ex20del(1)<br>ex18ex41del(1)<br>ex18ex44del(1)<br>ex18ex37del(1)<br>ex18ex32del(1)<br>ex18ex22del(1) | ex17dup(1)  |            |
| Ex18         | ex03ex17del(2)<br>ex14ex17del(2)<br>ex19ex45del(1)<br>ex19ex43del(1)                                                                     | ex18dup(1)  |            |
| Ex19         |                                                                                                                                          |             |            |
| Ex20         | ex21del(1)<br>ex19del(1)<br>ex16ex19del(1)                                                                                               |             |            |
| Ex21         | ex22ex26del(1)<br>ex22ex47del(1)<br>ex22ex31del(1)                                                                                       |             |            |
| Ex22         | ex21del(1)<br>ex19ex21del(1)                                                                                                             | ex22dup(1)  |            |
| Ex23         |                                                                                                                                          |             | ex23pt(8)  |
| Ex24         |                                                                                                                                          |             | ex24pt(8)  |
| Ex25         |                                                                                                                                          |             | ex25pt(10) |
| Ex26         |                                                                                                                                          |             | ex26pt(5)  |
| Ex27         |                                                                                                                                          |             | ex27pt(6)  |
| Ex28         |                                                                                                                                          |             | ex28pt(8)  |
| Ex29         |                                                                                                                                          |             | ex29pt(4)  |
| Ex30         |                                                                                                                                          |             |            |
| Ex31         |                                                                                                                                          |             |            |
| Ex32         |                                                                                                                                          |             | ex32pt(6)  |
| Ex33         |                                                                                                                                          |             | ex33pt(2)  |

| Exon Skipped | Mutation Class (# of Patients)                                                                                                                               |             |           |
|--------------|--------------------------------------------------------------------------------------------------------------------------------------------------------------|-------------|-----------|
|              | Deletion                                                                                                                                                     | Duplication | Point     |
| Ex34         |                                                                                                                                                              |             | ex34pt(9) |
| Ex35         |                                                                                                                                                              |             | ex35pt(5) |
| Ex36         |                                                                                                                                                              |             | ex36pt(5) |
| Ex37         |                                                                                                                                                              |             | ex37pt(4) |
| Ex38         |                                                                                                                                                              |             | ex38pt(9) |
| Ex39         |                                                                                                                                                              |             | ex39pt(4) |
| Ex40         | ex18ex39del(3)                                                                                                                                               |             |           |
| Ex41         | ex42ex43del(1)                                                                                                                                               |             |           |
| Ex42         |                                                                                                                                                              |             | ex42pt(5) |
| Ex43         | ex44del(12)<br>ex44ex49del(1)<br>ex44ex48del(1)                                                                                                              | ex43dup(1)  |           |
| Ex44         | ex45del(21)<br>ex45ex54del(7)<br>ex43ex43del(3)<br>ex10ex43del(1)<br>ex38ex43del(1)<br>ex19ex43del(1)<br>ex14ex43del(1)<br>ex42ex43del(1)                    |             |           |
| Ex45         | ex46ex47del(17)<br>ex44del(12)<br>ex46ex51del(9)<br>ex46ex48del(7)<br>ex46ex46del(2)<br>ex46ex60del(2)<br>ex46ex53del(2)<br>ex46ex55del(1)<br>ex18ex44del(1) | ex45dup(1)  |           |
| Ex46         | ex45del(21)<br>ex35ex45del(1)<br>ex19ex45del(1)                                                                                                              |             |           |
| Ex47         |                                                                                                                                                              |             | ex47pt(6) |

| Exon Skipped | Mutation Class (# of Patients)                                                                       |             |           |
|--------------|------------------------------------------------------------------------------------------------------|-------------|-----------|
|              | Deletion                                                                                             | Duplication | Point     |
| Ex48         |                                                                                                      |             | ex48pt(5) |
| Ex49         |                                                                                                      |             | ex49pt(1) |
| Ex50         | ex51del(17)<br>ex51ex55del(3)                                                                        | ex50dup(1)  |           |
| Ex51         | ex45ex50del(27)<br>ex49ex50del(15)<br>ex52del(12)<br>ex48ex50del(11)<br>ex50del(4)<br>ex47ex50del(1) | ex51dup(1)  |           |
| Ex52         | ex51del(17)<br>ex53ex55del(5)                                                                        |             |           |
| Ex53         | ex45ex52del(21)<br>ex52del(12)<br>ex49ex52del(7)<br>ex48ex52del(6)<br>ex50ex52del(4)                 | ex53dup(1)  |           |
| Ex54         | ex46ex53del(2)<br>ex55del(2)                                                                         | ex54dup(1)  |           |
| Ex55         | ex45ex54del(7)<br>ex49ex54del(4)<br>ex52ex54del(3)<br>ex48ex54del(3)<br>ex54del(1)                   |             |           |
| Ex56         | ex55del(2)<br>ex46ex55del(1)                                                                         |             |           |
| Ex57         |                                                                                                      |             |           |
| Ex58         |                                                                                                      |             |           |
| Ex59         |                                                                                                      |             |           |
| Ex60         |                                                                                                      |             | ex60pt(3) |
| Ex61         |                                                                                                      | ex61dup(1)  |           |
| Ex62         | ex63del(2)                                                                                           |             |           |
| Ex63         |                                                                                                      |             |           |



| Exon Skipped | Mutation Class (# of Patients) |             |           |
|--------------|--------------------------------|-------------|-----------|
|              | Deletion                       | Duplication | Point     |
| Ex64         |                                |             | ex64pt(5) |
| Ex65         |                                |             |           |
| Ex66         |                                |             |           |
| Ex67         |                                |             |           |
| Ex68         |                                |             |           |
| Ex69         |                                |             |           |
| Ex70         |                                |             |           |
| Ex71         |                                |             | ex71pt(2) |
| Ex72         |                                |             |           |
| Ex73         |                                |             |           |
| Ex74         |                                |             | ex74pt(8) |
| Ex75         |                                |             |           |
| Ex76         |                                |             |           |
| Ex77         |                                |             |           |
| Ex78         |                                |             |           |
| Ex79         |                                |             |           |
